# Supplementary material for: Functional cardiotoxicity assessment of cosmetic compounds using human-induced pluripotent stem cell-derived cardiomyocytes
Source: PubMed Central journal article supplement (PMC5773645; doi:10.1007/s00204-017-2065-z), 2017-09-22
Supplement: 204_2017_2065_MOESM1_ESM.pdf [file 204_2017_2065_MOESM1_ESM.pdf]

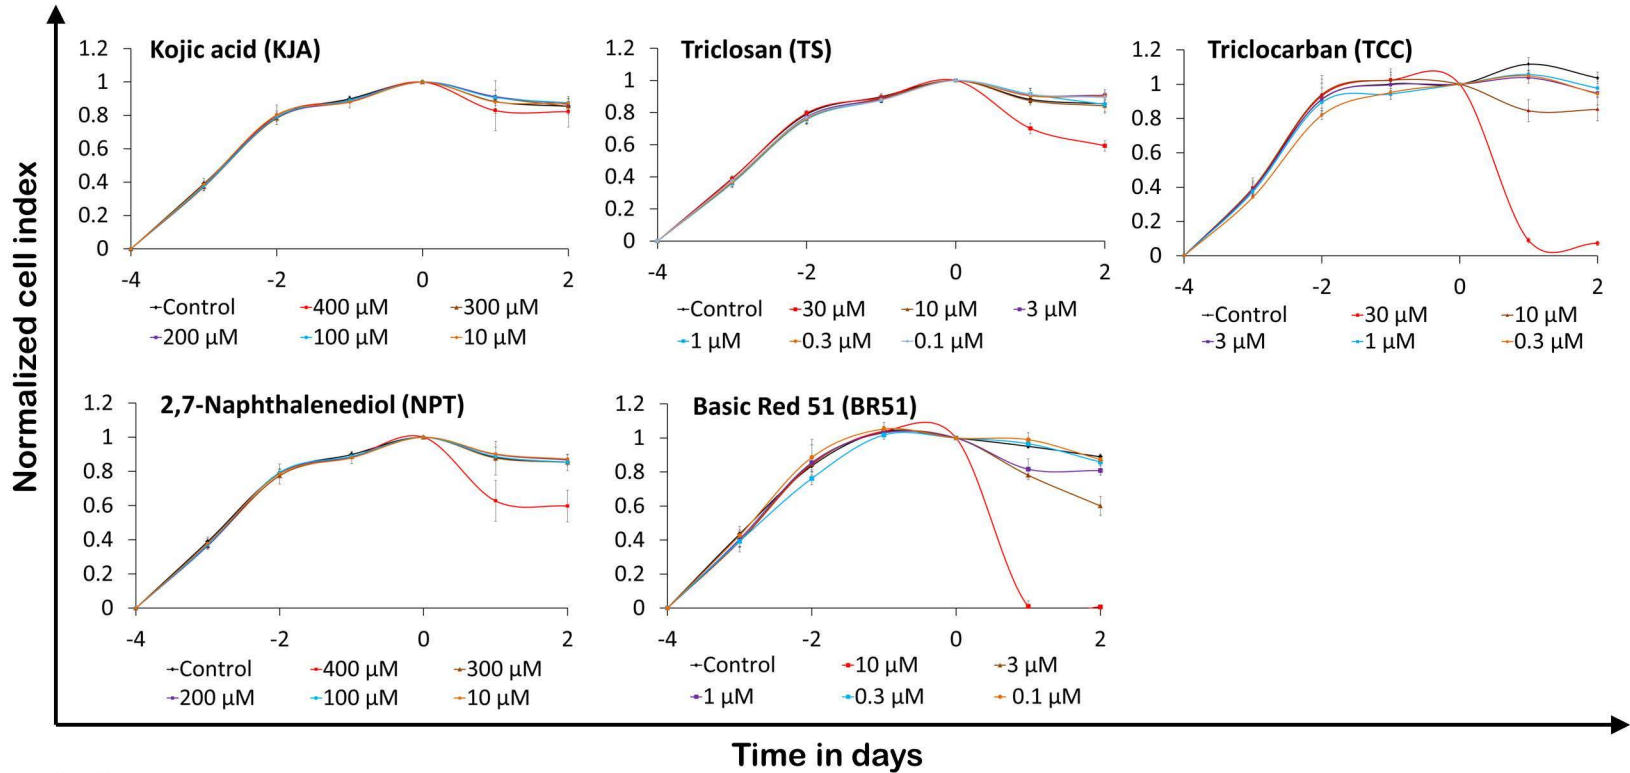

Figure S1

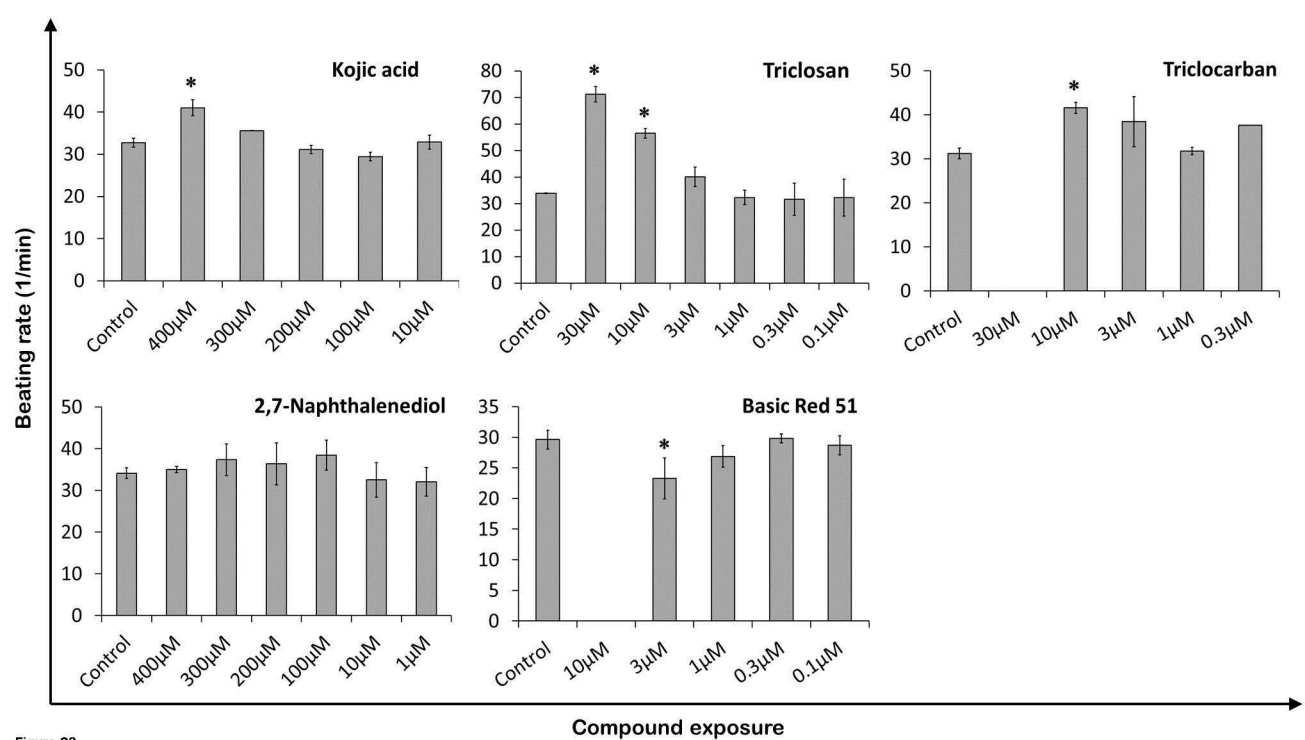

Figure S2

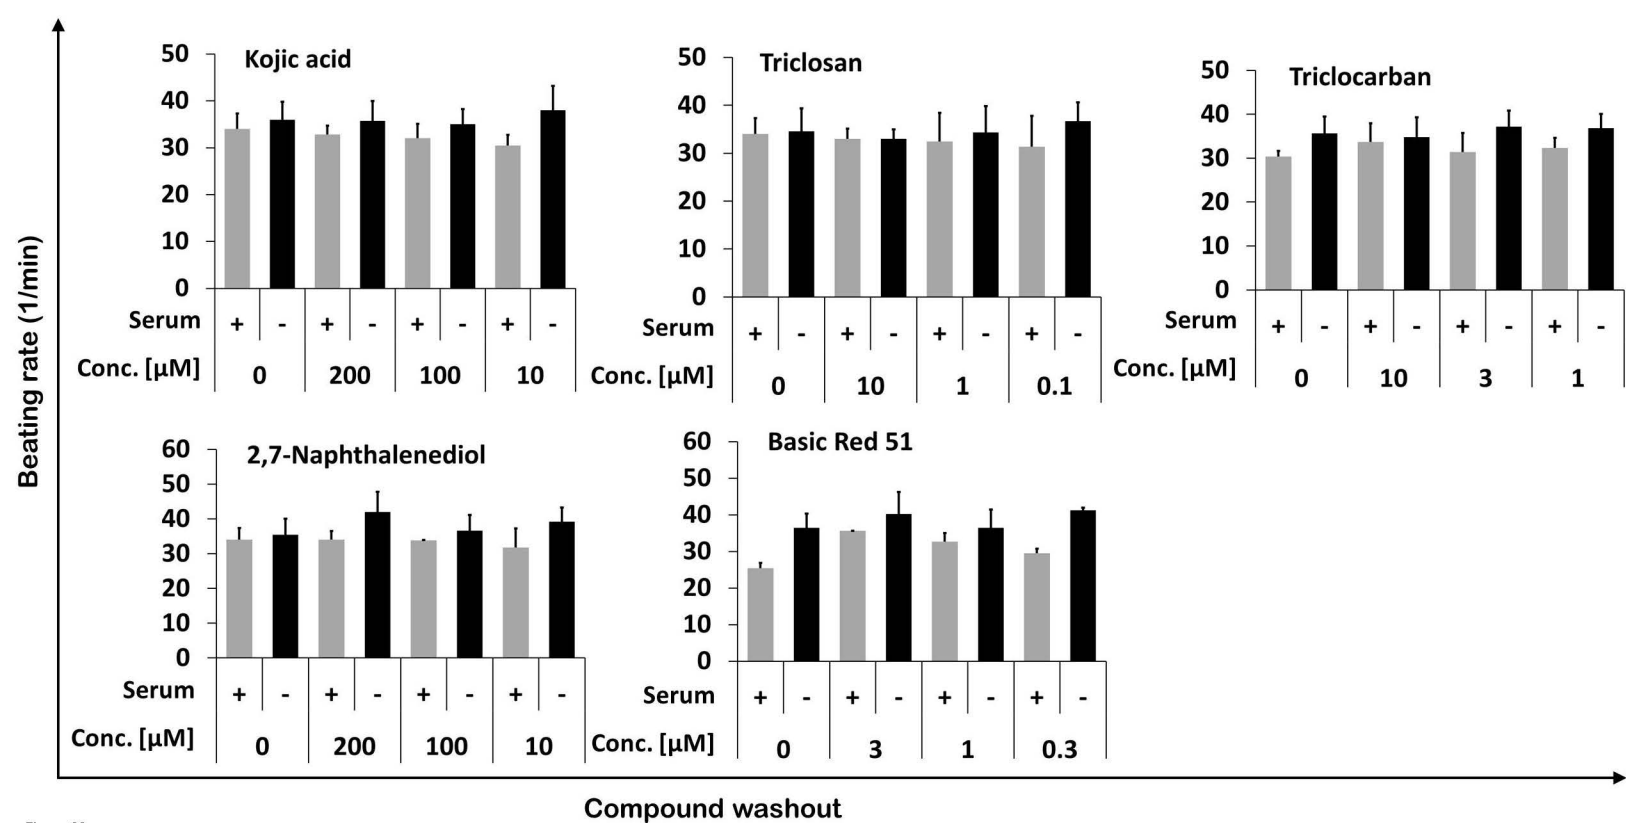

Figure S3
